1  
2 **First insights into the *Aurelia aurita* transcriptome response upon manipulation**  
3 **of its microbiome**

4  
5 Nancy Weiland-Bräuer<sup>2,#</sup>, Vasiliki Koutsouveli<sup>1,#</sup>, Daniela Langfeldt<sup>2, †</sup>, and Ruth A. Schmitz<sup>2\*</sup>

6 <sup>1</sup> GEOMAR Helmholtz Center for Ocean Research Kiel, Düsternbrooker Weg 20, 24105 Kiel,  
7 Germany

8 <sup>2</sup> Kiel University, General Microbiology, Am Botanischen Garten 1-9, 24118 Kiel, Germany

9 # Joint first authors

10 † Current address: Institute of Clinical Molecular Biology (IKMB), Kiel University, Am  
11 Botanischen Garten 11, 24118 Kiel, Germany

12  
13 \* Correspondence: [rschmitz@ifam.uni-kiel.de](mailto:rschmitz@ifam.uni-kiel.de); Tel.: + 49-431-880-4334 (Germany)

14  
15  
16  
17 **Keywords:** *Aurelia aurita*, microbiome, transcriptome, immune system, defense mechanisms,  
18 Quorum quenching

19  
20  
21  
22  
23  
24  
25  
26  
27  
28  
29

30 [Abstract](#)

31 The associated diverse microbiome contributes to the overall fitness of *Aurelia aurita*, particularly  
32 to asexual reproduction. However, how *A. aurita* maintains this specific microbiome or reacts to  
33 manipulations is unknown. In this report, the response of *A. aurita* to manipulations of its native  
34 microbiome was studied by a transcriptomics approach. Microbiome-manipulated polyps were  
35 generated by antibiotic treatment and challenging polyps with a non-native, native, and  
36 potentially pathogenic bacterium. Total RNA extraction followed by RNAseq resulted in over 155  
37 million reads used for a *de novo* assembly. The transcriptome analysis showed that the antibiotic-  
38 induced change and resulting reduction of the microbiome significantly affected the host  
39 transcriptome, e.g., genes involved in processes related to immune response and defense  
40 mechanisms were highly upregulated. Similarly, manipulating the microbiome by challenging the  
41 polyp with a high load of bacteria ( $2 \times 10^7$  cells/polyp) resulted in induced transcription of  
42 apoptosis-, defense-, and immune response genes. A second focus was on host-derived quorum  
43 sensing interference as a potential defense strategy. Quorum Quenching (QQ) activities and the  
44 respective encoding QQ-ORFs of *A. aurita* were identified by functional screening a cDNA-based  
45 expression library generated in *Escherichia coli*. Corresponding sequences were identified in the  
46 transcriptome assembly. Moreover, gene expression analysis revealed differential expression of  
47 QQ genes depending on the treatment, strongly suggesting QQ as an additional defense strategy.  
48 Overall, this study allows first insights into *A. aurita*'s response to manipulating its microbiome,  
49 thus paving the way for an in-depth analysis of the basal immune system and additional  
50 fundamental defense strategies.

## 51 1. Introduction

52 Cnidarians, such as the moon jellyfish *Aurelia aurita*, are distributed worldwide and play essential  
53 roles in shaping marine ecosystems (Brekman et al., 2015). Cnidaria are dated back to about 700  
54 million years and are considered a sister group to the Bilateria (Putnam et al., 2007; Park et al.,  
55 2012). Thus, they are among the simplest animals at the tissue level organization possessing two  
56 germ layers (ectoderm and endoderm) separated by the mesoglea (Ball et al., 2004). In addition  
57 to their morphological simplicity, many Cnidaria, particularly Scyphozoa, have a high level of  
58 developmental plasticity, allowing for an enormous tolerance, regeneration potential, and  
59 asexual proliferation during their life cycle (Richardson et al., 2009). Cnidaria have evolved and  
60 are constantly exposed to diverse microorganisms (Liu et al., 2019). This close association with  
61 microorganisms has profound effects on various host functions. Recent studies have  
62 demonstrated that specific host-associated microbiota can contribute to various host functions.  
63 Examples are host metabolism (Ochsenkühn et al., 2017), development (Rook et al., 2017), organ  
64 morphogenesis (Sommer and Bäckhed, 2013), pathogen protection and immunity (Moran and  
65 Yun, 2015), behavior (Ezenwa et al., 2012), environmental sensing and adaptation (Bang et al.,  
66 2018; Ziegler et al., 2019), developmental transitions (Webster and Reusch, 2017; Woznica et al.,  
67 2017), and reproduction (Chilton et al., 2015; Jacob et al., 2015).

68 Evidently, Cnidarians are constantly exposed to microbes in the environment; consequently,  
69 molecular analyses have revealed a variety of molecular pathways to respond to microbial  
70 exposure (Dierking and Pita, 2020). In the first step, extracellular surface receptors recognize  
71 microbe-associated molecular patterns (MAMPs) during microbial epithelium colonization (Chu  
72 and Mazmanian, 2013). MAMPs include lipopolysaccharides (LPSs), peptidoglycan (PGN),

73 flagellin, and microbial nucleic acids (Rosenstiel, 2009). In the first line of defense, antimicrobial  
74 peptides (AMPs) regulate establishing and maintaining a specific microbiota (Bosch, 2013; Bosch  
75 and Zasloff, 2021). Toll-like receptors (TLRs) at the host cell surface further perceive the MAMP  
76 signal, initiating MAMP-triggered immunity (Augustin et al., 2010; Bosch, 2013). Downstream of  
77 those conserved signaling cascades are stress-responsive transcription factors, including  
78 eukaryotic transcription factors of the proteins' NF-kappaB (NF-kB) family (Zheng et al., 2005).  
79 Recent studies revealed that eukaryotic hosts also use quorum quenching (QQ) as a strategy to  
80 respond to bacterial colonization (Grandclément et al., 2016). The hosts interfere with the small  
81 molecule-dependent bacterial communication through enzymatic degradation of the  
82 autoinducer, blocking autoinducer production, or its reception to control population-dependent  
83 behaviors like colonization, biofilm formation, and pathogenesis (Kiran et al., 2017; Mukherjee  
84 and Bassler, 2019). In the Cnidarian *Hydra*, the autoinducer signaling molecule 3-oxo-homoserine  
85 lactone has been shown to be converted into the inactive 3-hydroxy counterpart by a host-  
86 derived oxidoreductase allowing host colonization of the main colonizer *Curvibacter sp.*  
87 (Pietschke et al., 2017).

88 The Cnidarian *A. aurita* harbors a highly diverse and dynamic microbiota specific to the animal,  
89 the different sub-populations, and life stages (Weiland-Bräuer et al., 2015a). In the absence of  
90 the specific microbial community, the fitness of *A. aurita* was significantly compromised, and  
91 notably, asexual reproduction was almost halted (Weiland-Bräuer et al., 2020a). This microbial  
92 impact is crucial at the polyp life stage before entering the process of asexual offspring production  
93 (strobilation) to ensure a normal progeny output (Jensen et al., 2023). Moreover, in *A. aurita*,  
94 three proteins interfering with bacterial QS were identified (Weiland-Bräuer et al., 2019).

95 Incubation of native animals with potentially pathogenic bacteria induced the expression of the  
96 identified QQ-ORFs, strongly suggesting a host defense strategy.

97 Despite the growing knowledge about the impact of microbes on the host and the fundamental  
98 strategies of the host to respond, research to understand how microbiomes influence host gene  
99 expression is still in its infancy (Nichols and Davenport, 2021). Many studies of model organisms  
100 and humans demonstrated an interlinkage between the microbiome and the host's gene  
101 expression. However, the direction of causality mainly remained unanswered (Nichols and  
102 Davenport, 2021). Comparing conventional (microbiome-containing) to germ-free systems is one  
103 way to assess whether the microbiome plays a causative role in regulating gene expression  
104 (Bäckhed et al., 2012; Al-Asmakh and Zadjali, 2015; Fu et al., 2017; Pierre, 2022). Genome-wide  
105 transcriptomic analyses are now routinely used to quantify the changing levels of each transcript  
106 under different conditions (Conesa et al., 2016).

107 In the present study, we aimed to determine the influence of the associated microbiota on *A.*  
108 *aurita's* gene expression. After microbiome manipulation (by antibiotic treatment or bacterial  
109 challenge), RNA was extracted from polyps, followed by RNA-Seq and a *de novo* transcriptome  
110 assembly. Gene ontology categories and gene expression patterns were analyzed to elucidate  
111 how *A. aurita* recognizes and responds to the manipulation of its native microbiome and the  
112 presence of potential pathogens. A particular focus was on host-derived QQ activities as an  
113 additional potential defense strategy.

114

## 115 2. Materials and Methods

### 116 2.1. *Aurelia aurita* polyp husbandry

117 Husbandry is described in detail by Weiland-Bräuer *et al.* (Weiland-Bräuer et al., 2015a; Weiland-  
118 Bräuer et al., 2020a). Briefly, polyps of the sub-population North Atlantic (Roscoff, France) were  
119 kept in the lab in 2-liter plastic tanks in 3 % artificial seawater (ASW) (tropical sea salts; Tropic  
120 Marin). Polyps were fed twice a week with freshly hatched *Artemia salina* (HOBBY, Graftschafft-  
121 Gelsdorf, Germany).

### 122 2.2. Reduction of the native *Aurelia aurita* polyp microbiota by antibiotics

123 Single native polyps were placed in 48 well multiwell plates in 1 mL ASW supplemented with an  
124 antibiotic mixture (Provasoli's antibiotic mixture with final concentrations of 360,000 U/liter  
125 penicillin G, 1.5 mg/liter chloramphenicol, 1.8 mg/liter neomycin, and 9,000 U/liter polymyxin B;  
126 all components from Carl Roth, Karlsruhe, Germany). No food was provided during the antibiotic  
127 treatment. The reduction and consequent change of the microbiota were tested by plating a  
128 single homogenized polyp (10 replicates) on Marine Bouillon agar plates (Carl Roth, Karlsruhe,  
129 Germany). Plates were incubated for 5 days at 20 °C. Colony forming units (cfu) were calculated,  
130 and an  $87 \pm 9$  % reduction per polyp was determined.

### 131 2.3. Bacterial growth conditions and microbial challenge of polyps

132 Bacteria (*Pseudoalteromonas espejiana* GenBank accession No. MK967174, and *Vibrio*  
133 *anguillarum* GenBank accession No. MK967055) for the microbial challenge were isolated from  
134 *A. aurita* polyps (Weiland-Bräuer et al., 2020b). Strains were grown in Marine Bouillon (MB; Carl  
135 Roth, Karlsruhe, Germany) at 30 °C and 120 rpm to optical turbidity at 600 nm of 0.8. *Klebsiella*  
136 *oxytoca* M5a1 (DSM No. 7342) was similarly grown in Luria-Bertani (LB) medium. Bacterial cell

137 numbers were determined using a Neubauer count chamber (Assistant, Sondheim vor der Röhn,  
138 Germany). Pools of 20 native *A. aurita* polyps were separated in 6-well multiwell plates (Greiner,  
139 Kremsmünster, Austria) in 4 mL 3 % ASW after washing them twice with sterile ASW. A pool of 20  
140 native *A. aurita* polyps was incubated with  $10^8$  cells/mL (in 4 mL) of the respective strain at 20 °C  
141 for 30 min. Next, polyps were washed twice with sterile ASW to remove the bacteria and used to  
142 isolate total RNA.

#### 143 2.4. Experimental design for transcriptome analysis

144 The North Atlantic sub-population polyps were generated from a single mother polyp by clonal  
145 budding. Pools of 20 daughter polyps were separated into 6-well plates in 4 ml 3 % ASW. Polyps  
146 were kept in five conditions without food supply: 1. native polyps without treatment, 2. antibiotic  
147 (AB)-treated polyps, 3. native polyps challenged with  $10^8$  cells/mL *Klebsiella oxytoca* M5a1, 4.  
148 native polyps challenged with  $10^8$  cells/mL *Pseudoalteromonas espejiana*, and 5. native polyps  
149 challenged with  $10^8$  cells/mL *Vibrio anguillarum* (**Fig. 1**). Three replicates (3 x 20 polyps) were  
150 used for each condition. For the bacterial challenges, 20 polyps in 4 mL ASW were supplemented  
151 with  $4 \times 10^8$  cells and incubated for 30 min (**Fig. 1**). The total RNA was extracted from each pool of  
152 polyps.

153

154

155

156

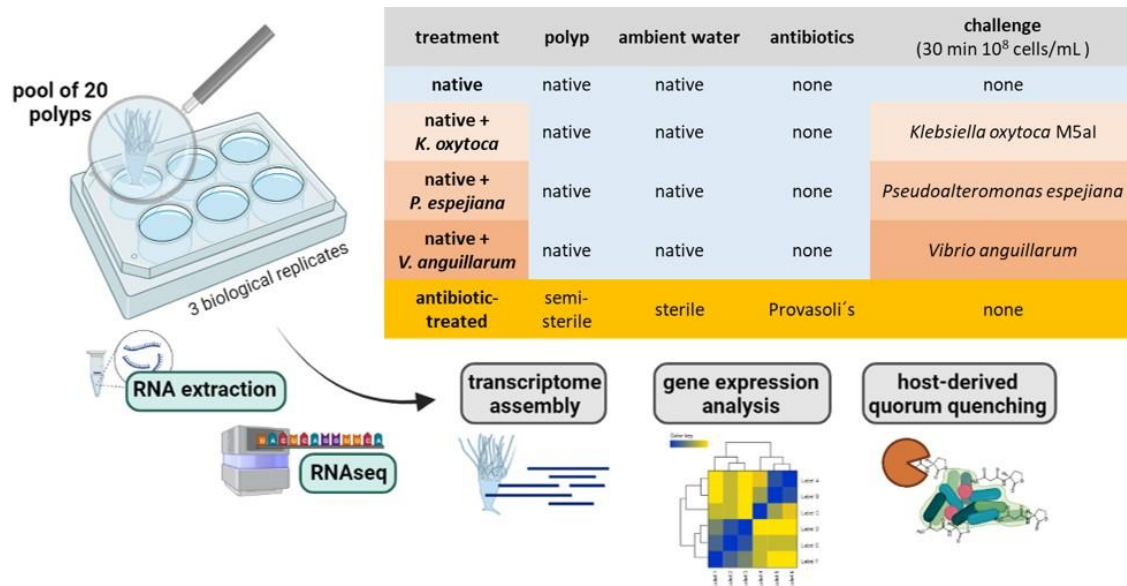

157 **Figure 1: Experimental setup.** RNA extraction with subsequent RNAseq and analysis was conducted on a  
 158 pool of 20 polyps (3 biological replicates). Polyps were kept under native and microbiome-manipulated  
 159 conditions.

160

## 161 2.5. RNA isolation

162 Total RNA of a pool of 20 *A. aurita* polyps was isolated with an adapted protocol of Gold *et al.*,  
 163 2019 (Gold et al., 2019). In more detail, polyps were washed three times with sterile ASW (to  
 164 remove antibiotic residues) and homogenized with a motorized pestle. RiboLock RNase Inhibitor  
 165 (40 U/μL, Thermo Fisher Scientific, Waltham/Massachusetts, USA), 200 μL lysis solution (100 mM  
 166 Tris/HCl, pH 5.5, 10 mM disodium EDTA, 0.1 M NaCl, 1 % SDS, 1 % β-mercaptoethanol), and 2 μL  
 167 Proteinase K (25 mg/mL, Thermo Fisher Scientific, Waltham/Massachusetts, USA) were added to  
 168 the homogenate and incubated for 10 min at 55 °C. Chilled solutions were added with 5 μL of 3  
 169 M sodium acetate (pH 5.2) and 250 μL phenol-chloroform-isoamyl alcohol (25:24:1) and  
 170 incubated for 15 min on ice prior to 15 min centrifugation at 12,000 x g at 4 °C. The upper phase  
 171 was mixed with 1 volume 2-propanol, and precipitation occurred at -80 °C overnight. The  
 172 precipitate was centrifuged for 15 min at 12,000 x g at 4 °C. The pellet was washed twice with 70



173 % ethanol before the air-dried pellet was dissolved in 25  $\mu$ L RNase-free water. DNA  
174 contaminations were removed with Turbo DNA-free DNase (Thermo Fisher Scientific,  
175 Waltham/Massachusetts, USA). The RNA quality and quantity were assessed by NanoDrop1000  
176 (Thermo Fisher Scientific, Waltham/Massachusetts, USA) and 1.5 % agarose gel electrophoresis,  
177 and the cDNA library was prepared with DNA-free host RNA (500 ng) using the TruSeq Stranded  
178 mRNA Library Preparation kit. The library was sequenced with the NextSeq 500 System (Illumina,  
179 San Diego/ California, USA).

## 180 2.6. Transcriptome analysis

181 The raw reads were trimmed with Trimmomatic (Bolger et al., 2014) to remove bad-quality reads  
182 and the adapters. A *de novo* assembly with the trimmed sequences was conducted with the  
183 Trinity package v2.8.4 (Grabherr et al., 2011b; a). The quality of the *de novo* assembly was  
184 assessed with several parameters, such as the N50 value and the percentage of the assembly-  
185 mapped reads, which was calculated with Bowtie2. Finally, Benchmarking Universal Single-Copy  
186 Orthologs (BUSCO V2/3) against metazoan cassettes (Simão et al., 2015) was used to evaluate the  
187 completeness of the assembly regarding the core genes found in metazoans.

188 A Blastx of the transcriptome assembly was executed against the Swiss-Prot database for  
189 metazoans. For the gene expression analysis, reads were mapped to the reference assembly with  
190 Bowtie2 (Langmead and Salzberg, 2012). Transcript quantification was performed with RSEM (Li  
191 and Dewey, 2011). The differential gene expression (DGE) analysis was done with edgeR  
192 (Robinson et al., 2010; McCarthy et al., 2012). Pairwise comparisons between all experimental  
193 conditions were performed using  $FDR \leq 0.001$  and 2-fold changes as statistical parameters.  
194 Furthermore, GO enrichment analysis was conducted using a Fisher's Exact Test in Blast2GOPRO

195 (Conesa et al., 2005) with a p-value threshold of  $\leq 0.05$ . Here, the total annotation file of the  
196 reference transcriptome was used as the "reference dataset", whereas the upregulated genes in  
197 each condition served as the "test dataset". Based on sequence depth and quality, only two out  
198 of three biological replicates were used for the gene expression analysis for the conditions of  
199 native polyps and native polyps under the bacterial challenges. Transcriptome data is deposited  
200 under the BioProject ID PRJNA938117.

### 201 [2.7. Quorum quenching \(QQ\) assay](#)

202 QQ assays using the reporter strains AI1-QQ.1 and AI2-QQ.1 were performed with cell-free  
203 supernatants and cell extracts of EST clones from the *A. aurita* EST library as described (Weiland-  
204 Bräuer et al., 2015b). Following the manufacturer's protocol, the plasmids of identified QQ-active  
205 single EST clones were purified using the Presto Mini Plasmid kit (GeneAid, New Taipei City,  
206 Taiwan). The respective inserts were Sanger sequenced at the Institute of Clinical Molecular  
207 Biology in Kiel with the primer set T7\_Promoter (5'-TAATACGACTCACTATAGGG-3') and  
208 T7\_Reverse (5'-TAGTTATTGCTCAGCGGTGG-3'); submission ID 2678799.

209

## 210 [3. Results](#)

211 A transcriptomics approach was applied to gain insights into the response of *A. aurita* polyps to  
212 manipulation of its native, associated microbiota, with a particular focus on quorum sensing  
213 interference as a potential host defense strategy. In general, pools of 20 polyps were treated and  
214 processed together in the experiments, each with three biological replicates using the following  
215 treatments: native, antibiotic-treated polyps resulting in  $87 \pm 9$  % reduced microbial cells per

216 polyp (cfu/polyp), and native polyps challenged with *Klebsiella oxytoca* M5a1, *Pseudoalteromonas*  
217 *espejiana*, or *Vibrio anguillarum* ( $2 \times 10^7$  cells/polyp, **Fig. 1**). The respective pools were used for  
218 total RNA extraction followed by RNAseq and transcriptome analysis.

### 219 3.1. Statistics of the *de novo* transcriptome assembly

220 The RNAseq approach overall resulted in 167,269,257 raw reads. After quality trimming,  
221 145,746,530 reads (87.1 % of the total reads) remained for further analysis and were used for the  
222 *de novo* transcriptome assembly (**Tab. S1A**). The *de novo* assembly resulted in 213,897 transcripts  
223 and 160,700 genes (**Tab. S1A**) with an N50 value of 1,170 (**Tab. S1B**). 94.25 % of reads were  
224 successfully aligned back to the assembly, while the completeness of genes was 96.42 % according  
225 to the BUSCO score for metazoans (**Tab. S1B**). 30 % (597,796 transcripts) of the assembly revealed  
226 an annotation against the Swiss-Prot database for metazoans (**Tab. S2**).

### 227 3.2. Manipulation of its microbiome affects *A. aurita*'s transcriptome

228 Transcriptome analysis identified five separated clusters corresponding to the different  
229 conditions, while biological replicates of a condition cluster together (**Fig. 2**). It should be noted  
230 that three replicates were only analyzed for antibiotic (AB)-treated polyps, as all other conditions  
231 resulted in an unacceptable low sequence depth for one replicate. Notably, two clusters were  
232 identified within the hierarchical clustering of transcripts. Here, native and AB-treated conditions  
233 yielded a tremendous difference. AB-treated polyps showed a massive reduction of the microbial  
234 load (by  $87 \pm 9$  %), assuming a rigorous change in the abundance and diversity of microbial  
235 colonizers. Bacteria-challenged polyps showed a mixture of native and AB-treated expression  
236 patterns (**Fig. 2**). In more detail, the comparison of native and AB-treated polyps resulted in the  
237 highest number of differentially expressed genes (22,073 genes), with 10,451 upregulated and

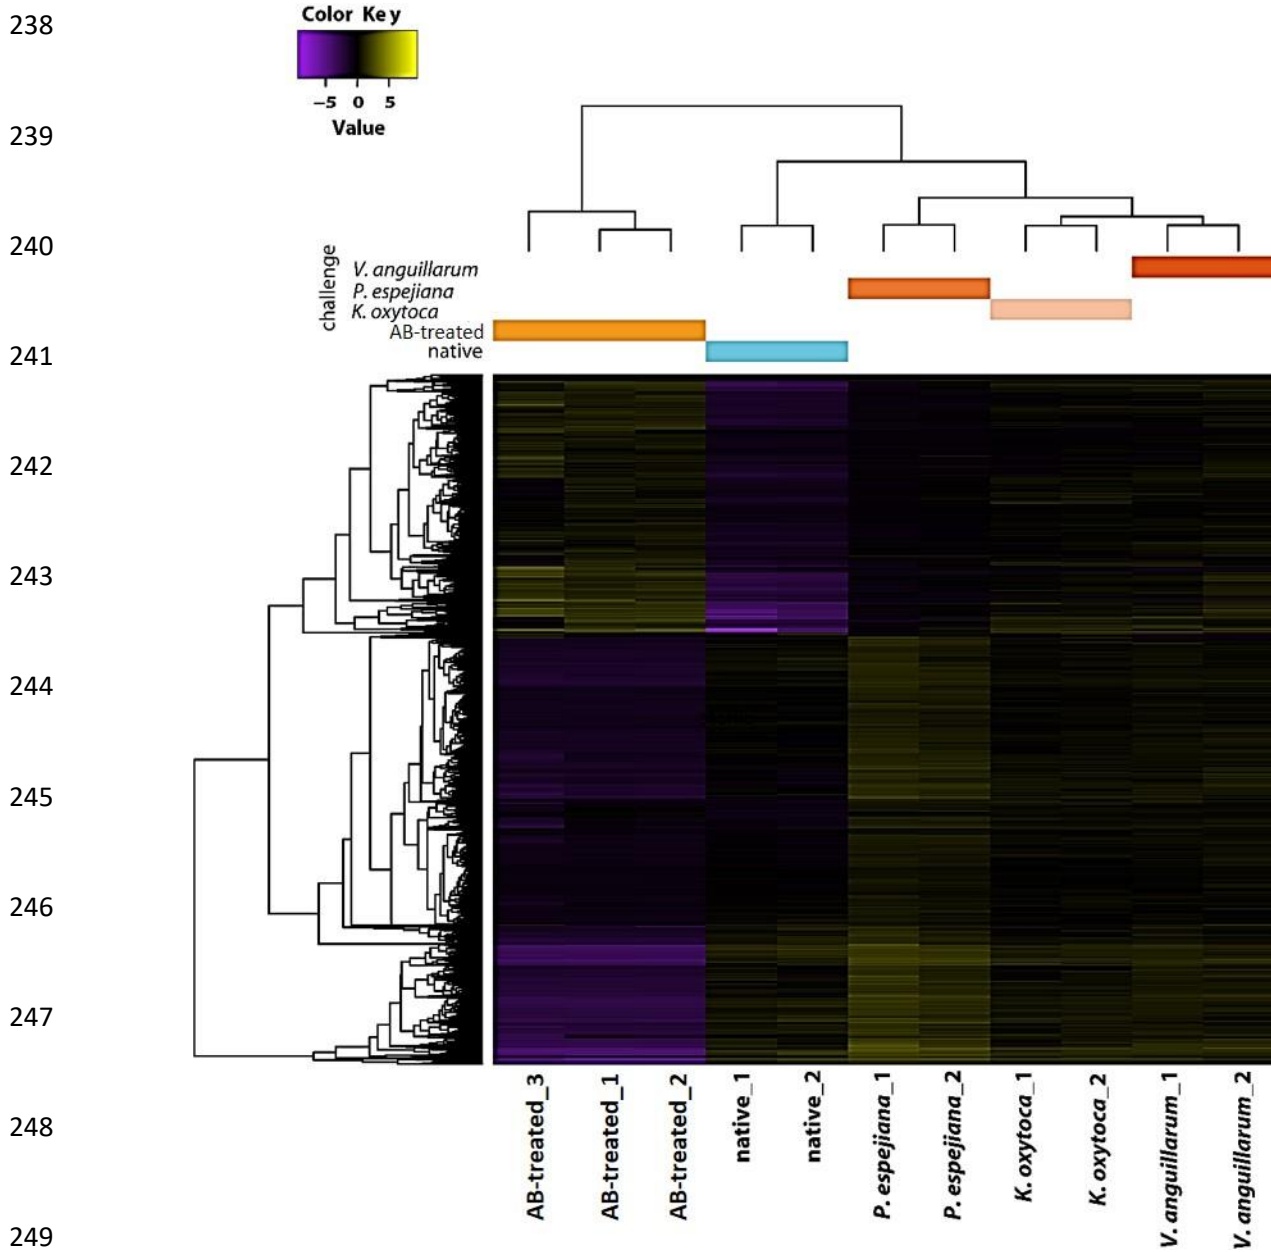

250 **Figure 2: Holistic expression patterns of *A. aurita* polyps.** Heatmap including the Differential Expressed  
251 (DE) genes in all the pairwise comparisons of the native, Ab-treated, and bacteria-challenged polyps,  
252 including replicates.

253

254

255 11,622 down-regulated genes in AB-treated compared to native polyps (**Tab. S3A**). According to  
256 the GO enrichment analysis (Conesa et al., 2005), the 10,451 upregulated genes were  
257 overrepresented in processes related to inflammation and immune response (e.g., acute  
258 inflammatory response to antigenic stimuli, MAP-kinase activity, cytokine production, and  
259 neutrophil cell activation) (**Fig. 3A; Tab. S4A**). Genes involved in immune response and apoptosis  
260 included, e.g., Caspases, Apoptosis regulators, Interferones, and Toll-like receptors (**Fig. 3B, Tabs.**  
261 **S3A, S4A**). On the contrary, down-regulated genes in AB-treated polyps were enriched for  
262 processes related to development, morphogenesis, reproduction, stimuli response, and signaling  
263 (**Figs. 3C, D; Tabs. S3A, S4A**).

264 When comparing expression patterns between native and bacteria-challenged polyps,  
265 differences based on the bacterial species used in each challenge were revealed (**Fig. 4**). The  
266 comparison of native polyps compared to those challenged with *V. anguillarum* gave the highest  
267 number of differentially expressed (DE) genes (7,193 genes; **Fig. 4A, Tab. S3B**), followed by polyps  
268 challenged with *K. oxytoca* (6,974 DE genes; **Fig. 4A, Tab. S3C**), and *P. espejiana* (2,721 genes;  
269 **Figs. 4A, Tab. S3D**). We observed 2,210 genes were commonly upregulated among the treatments  
270 compared to native polyps (**Fig. 4A, Tab. S3E**). At the same time, 52 genes were jointly  
271 downregulated (**Fig. 4B, Tab. S3E**). Genes related to biological processes, such as defense,  
272 immune and inflammatory responses, and the regulation of apoptotic processes, were  
273 upregulated in bacteria-challenged polyps (**Fig. 4B, Tab. S3E**). In contrast, genes related to  
274 organism development, cell cycle processes, and cytoskeleton organization were down-regulated  
275 in challenged polyps (**Fig. 4B, Tab. S3E**). Moreover, exclusively upregulated and down-regulated  
276 genes were identified for each bacterial challenge (**Fig. 4**). 1,319 genes were exclusively

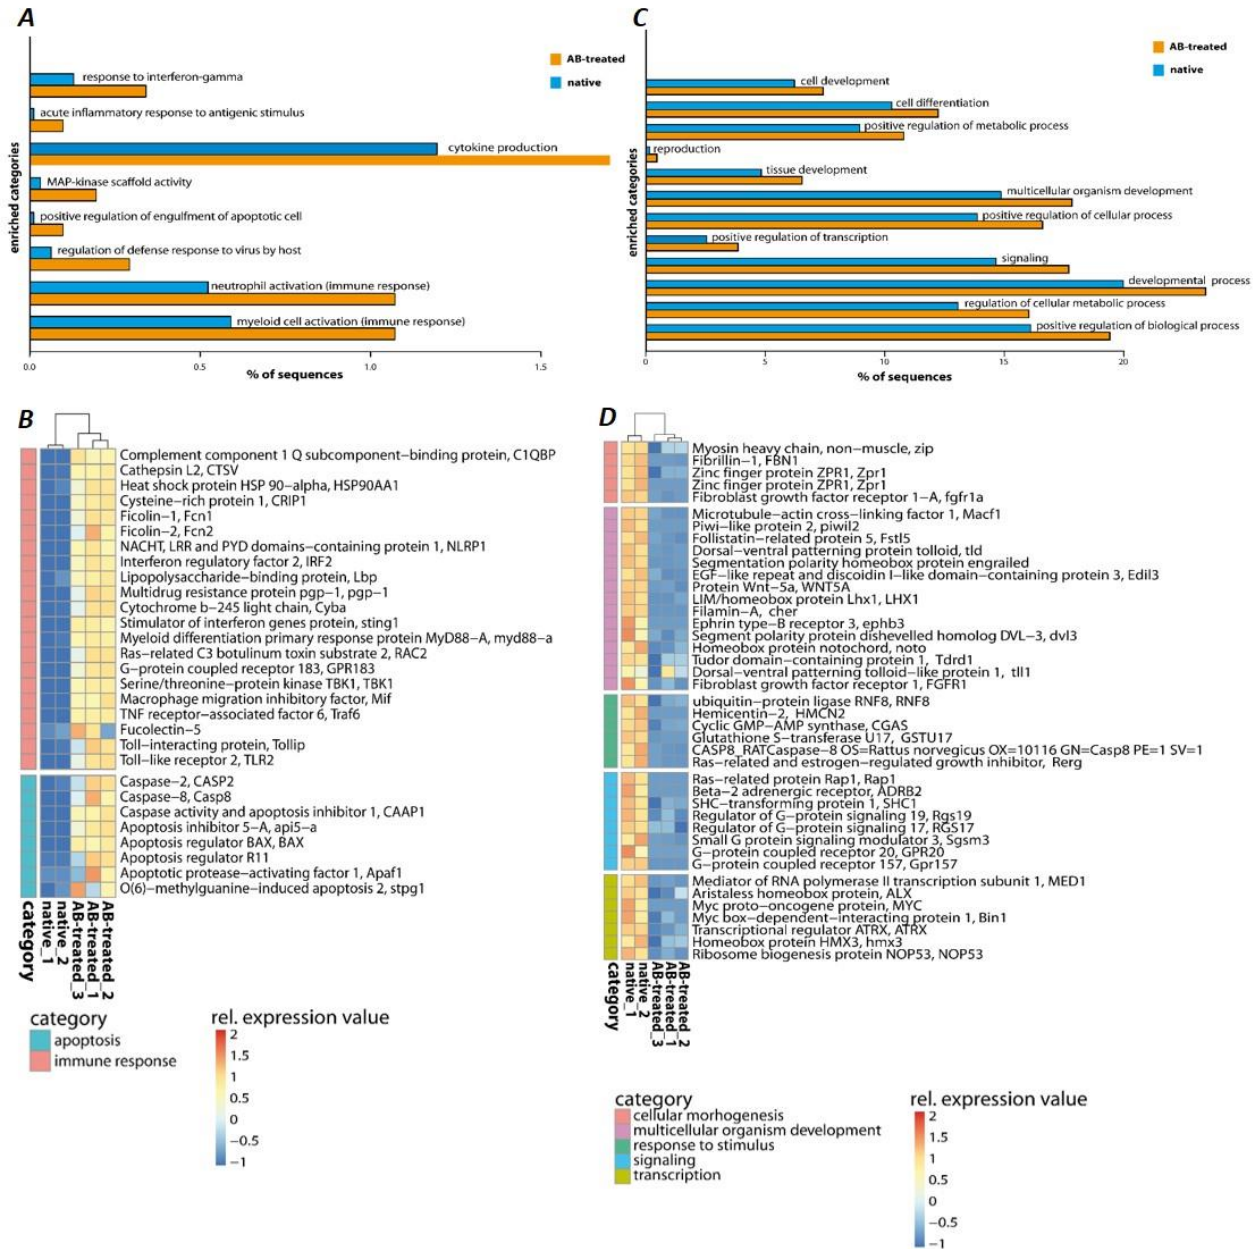

277 **Figure 3: GO enrichment analysis of differentially expressed genes of native and Ab-treated *A. aurita***  
 278 **polyps. (A, C)** Barplots with GO-enriched gene categories when comparing native and Ab-treated polyps.  
 279 Barplots indicate the proportion (%) of DE gene sequences involved in **(A)** upregulated and **(C)** down-  
 280 regulated GO-enriched categories compared to the reference (*de novo* assembly). **(B, D)** Heatmap of  
 281 upregulated and down-regulated genes with the comparison of native and AB-treated polyps related to  
 282 **(B)** immune response and apoptosis **(D)** and common physiological processes. Relative expression level  
 283 increase from blue to red.

284

285

286

287

288

289

290

291

292

293

294

295

296

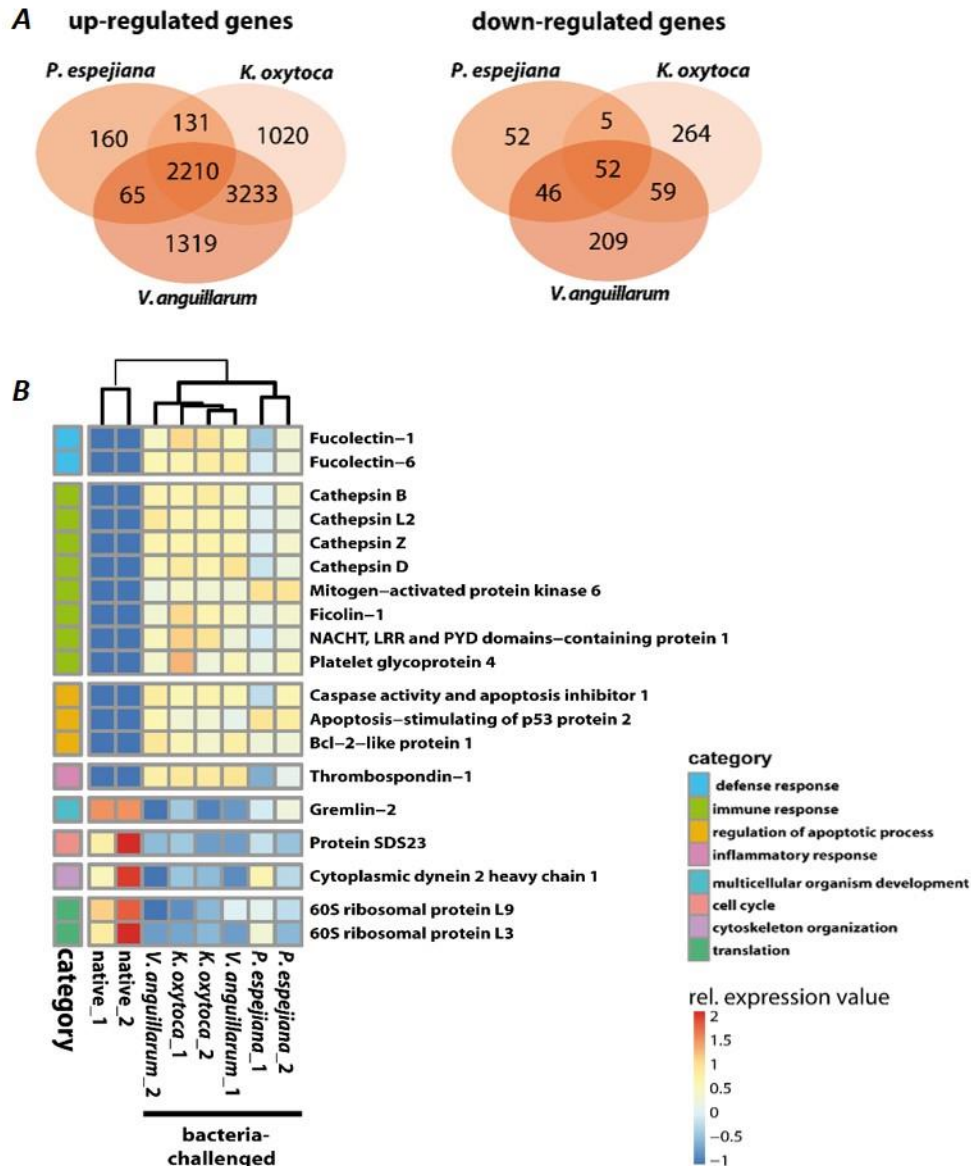

297 **Figure 4: GO enrichment and differential expression analysis of genes divergently transcribed in native**  
 298 **compared to bacteria-challenged polyps. (A)** Venn diagram indicating the genes that are commonly and  
 299 exclusively upregulated (left panel) or down-regulated (right panel) in the different bacteria-challenged  
 300 conditions. **(B)** Heatmap of up- and downregulated genes in native compared to bacteria-challenged  
 301 polyps. Relative expression level increases from blue to red.

302

303 upregulated in *V. anguillarum*-challenged polyps (**Fig. 4A left panel, Tab. S3F**), 1,020 genes were  
 304 exclusively upregulated in polyps challenged with *K. oxytoca* (**Fig. 4A left panel, Tab. S3G**), and  
 305 160 genes exclusively upregulated in *P. espejiana*-challenged polyps (**Fig. 4A left panel, Tab. S3H**).

306 Similarly, exclusively down-regulated genes were identified (**Fig. 4A, right panel**). Analyzing the  
307 GO-enriched categories for each species (**Tab. S4B-D**), we found categories common among all  
308 treatments (**Tab. S4E**) as well as categories present in two different treatments or only in one (**Fig.**  
309 **4B, Tab. S4B-D**). Focusing on genes exclusively upregulated after each species-specific challenge,  
310 we indeed observed that the same GO categories, e.g., immune response, MAPK signal  
311 transduction, autophagy, and DNA repair, were enriched to different degrees, though  
312 represented by various genes (depicted in **Fig. 5**).

### 313 3.3. Bacterial challenge of polyps affects host Quorum quenching

314 Recent studies revealed that interfering with Quorum sensing, so-called quorum quenching (QQ),  
315 might be a fundamental, additional inter-phylum interaction to maintain metaorganismal  
316 homeostasis. Consequently, we aimed to identify host-derived QQ activities. An expressed  
317 sequence tag (EST) library from *A. aurita* polyps-derived mRNA was constructed in *E. coli* SoluBL21  
318 (Ladewig et al., 2023). The library consisted of 29,952 clones with an insertion efficiency of  
319 approx. 98 % and an average insert size of 1.46 kbp, resulting in 43 Mbps cloned host  
320 transcriptome, corresponding to an estimated 11.4 % coverage (calculated *A. aurita* genome size  
321 376 Mbps (Gold et al., 2019)). The *A. aurita* EST library was successively screened for QQ activities  
322 towards acyl-homoserine lactones (AHL) and autoinducer-2 (AI-2) in cell-free cell extracts and  
323 culture supernatants of the EST clones using established *E. coli*-based reporter systems (Weiland-  
324 Bräuer et al., 2015b). Overall, 37 out of 29,952 EST clones were identified as QQ active (**Tab. 1**).  
325 Predominantly, QQ activities against the Gram-negative signaling molecule AHL were detected.  
326 Although those host-derived QQ activities were identified in a functional screen, their biological  
327 activities *in vivo* and their functions in *A. aurita* have to be explored. In a first attempt, plasmid



328 **Tab. 1: *Aurelia aurita*-derived quorum quenching activities derived from an expressed sequence tag**  
 329 **(EST) library.** Functionally identified QQ-ORFs are listed with their QQ activity in the cell-free cell extract  
 330 (CE) and culture supernatant (SN) against acyl-homoserine lactones (AHL) and autoinducer-2 (AI-2) with  
 331 their potential annotations; x, activity; -, no activity.

| QQ-ORF   | Original clone designation | QQ activity |      | QQ-ORF   | Original clone designation | QQ activity |      |
|----------|----------------------------|-------------|------|----------|----------------------------|-------------|------|
|          |                            | AHL         | AI-2 |          |                            | AHL         | AI-2 |
| QQ_Aa_1  | 115/H7                     | x           | x    | QQ_Aa_20 | 118/F5                     | x           | x    |
| QQ_Aa_2  | 118/E4                     | x           | -    | QQ_Aa_21 | 164/B2                     | x           | -    |
| QQ_Aa_3  | 118/G4                     | x           | x    | QQ_Aa_22 | 164/C8                     | x           | -    |
| QQ_Aa_4  | 127/C7                     | x           | x    | QQ_Aa_23 | 164/D1                     | x           | -    |
| QQ_Aa_5  | 164/A6                     | x           | -    | QQ_Aa_24 | 164/D6                     | x           | -    |
| QQ_Aa_6  | 164/E2                     | x           | x    | QQ_Aa_25 | 164/F2                     | x           | -    |
| QQ_Aa_7  | 184/A11                    | x           | -    | QQ_Aa_26 | 164/G1                     | x           | -    |
| QQ_Aa_8  | 184/B9                     | x           | -    | QQ_Aa_27 | 127/A8                     | x           | x    |
| QQ_Aa_9  | 202/G6                     | x           | -    | QQ_Aa_28 | 127/A10                    | x           | -    |
| QQ_Aa_10 | 208/E9                     | x           | -    | QQ_Aa_30 | 127/C12                    | x           | -    |
| QQ_Aa_11 | 208/A3                     | x           | -    | QQ_Aa_31 | 127/F8                     | x           | -    |
| QQ_Aa_12 | 213/E2                     | x           | -    | QQ_Aa_32 | 184/A6                     | x           | -    |
| QQ_Aa_13 | 213/F2                     | x           | -    | QQ_Aa_33 | 213/B7                     | x           | -    |
| QQ_Aa_14 | 217/H4                     | x           | -    | QQ_Aa_34 | 223/E7                     | x           | -    |
| QQ_Aa_15 | 221/C11                    | x           | x    | QQ_Aa_35 | 270/C5                     | x           | x    |
| QQ_Aa_16 | 284/H11                    | x           | -    | QQ_Aa_36 | 273/A1                     | x           | -    |
| QQ_Aa_17 | 115/A1                     | x           | -    | QQ_Aa_37 | 273/F12                    | x           | x    |
| QQ_Aa_18 | 115/A11                    | x           | x    | QQ_Aa_38 | 284/A10                    | x           | x    |
| QQ_Aa_19 | 115/G1                     | x           | -    |          |                            |             |      |

332

333

334

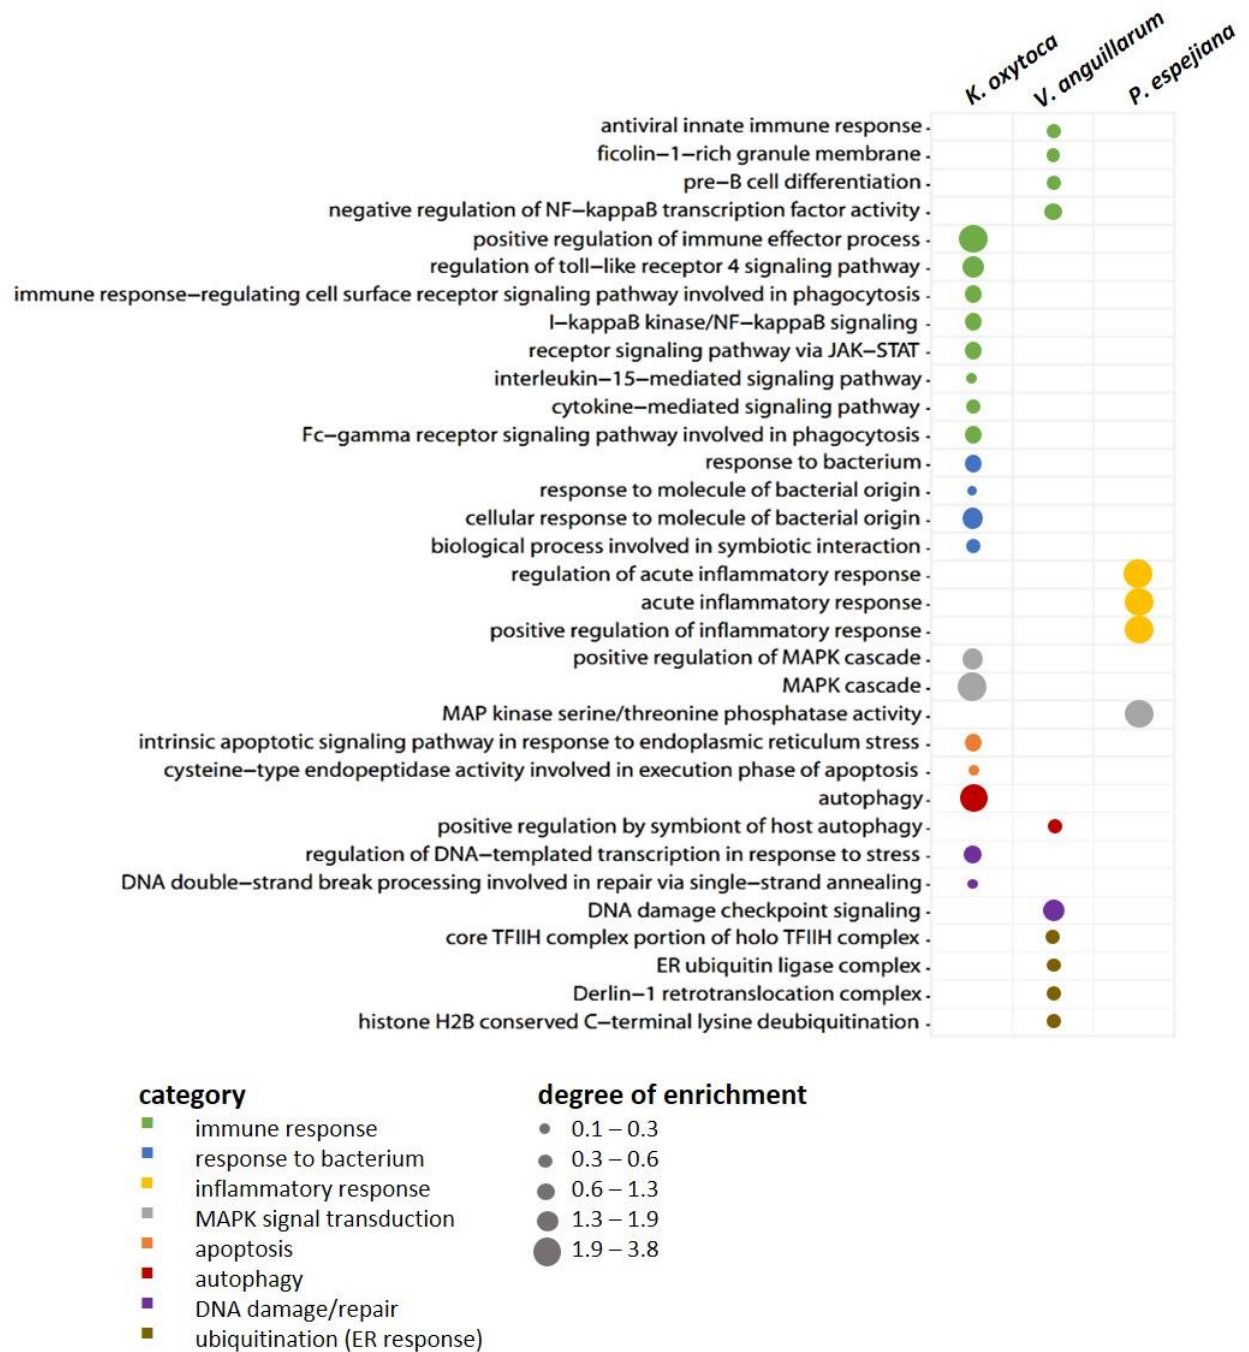

335

336 **Figure 5: Exclusively upregulated genes in native vs. bacteria-challenged polyps.** Bubble plot showing the  
 337 degree of enrichment per category of exclusively upregulated genes in each bacteria-challenged compared  
 338 to native conditions.

339

340

341 insertions of QQ-active single EST clones were sequenced, and sequence data subsequently  
342 checked for homologies in the *A. aurita* transcriptome assembly. All QQ-conferring sequences  
343 were identified in the transcriptome assembly with homologies ranging from 83 to 100 % (**Tab.**  
344 **S5**). Furthermore, public databases (NCBI, UniProt, PFAM) were used for homology predictions  
345 and annotation (**Tab. S5**). Unexpectedly, several QQ-ORFs showed homologies to highly  
346 conserved ribosomal proteins, suggesting a moonlighting function of those proteins (Jeffery,  
347 2003; Singh and Bhalla, 2020). Secondly, analyzing transcription levels of those identified QQ-  
348 ORFs in the generated RNAseq data set (see above) allowed first insights into their transcriptional  
349 regulation in response to the respective treatments, which might support predicting their  
350 biological role. Relative expression of the 37 QQ-conferring genes was calculated for microbiome-  
351 manipulated versus native polyps. Hierarchical clustering observed four clusters of expression  
352 profiles. The first cluster represents QQ genes similarly expressed in microbiome-manipulated  
353 polyps compared to native ones (**Fig. 6**, right column highlighted in grey). The second cluster of  
354 genes showed decreased expression in all treatments, except when challenged with *P. espejiana*  
355 (**Fig. 6**, right column light orange cluster). The third cluster summarizes those genes with  
356 increased expression regardless of the type of manipulation (**Fig. 6**, right column dark orange  
357 cluster). The fourth cluster includes those genes with an increased expression after adding  
358 potential pathogens but reduced expression when polyps were AB-treated (**Fig. 6**, right column  
359 green cluster). Notably, *P. espejiana* primarily showed increased expression of QQ-ORFs; thus,  
360 hierarchal clustering showed the highest dissimilarity compared to the other treatments.

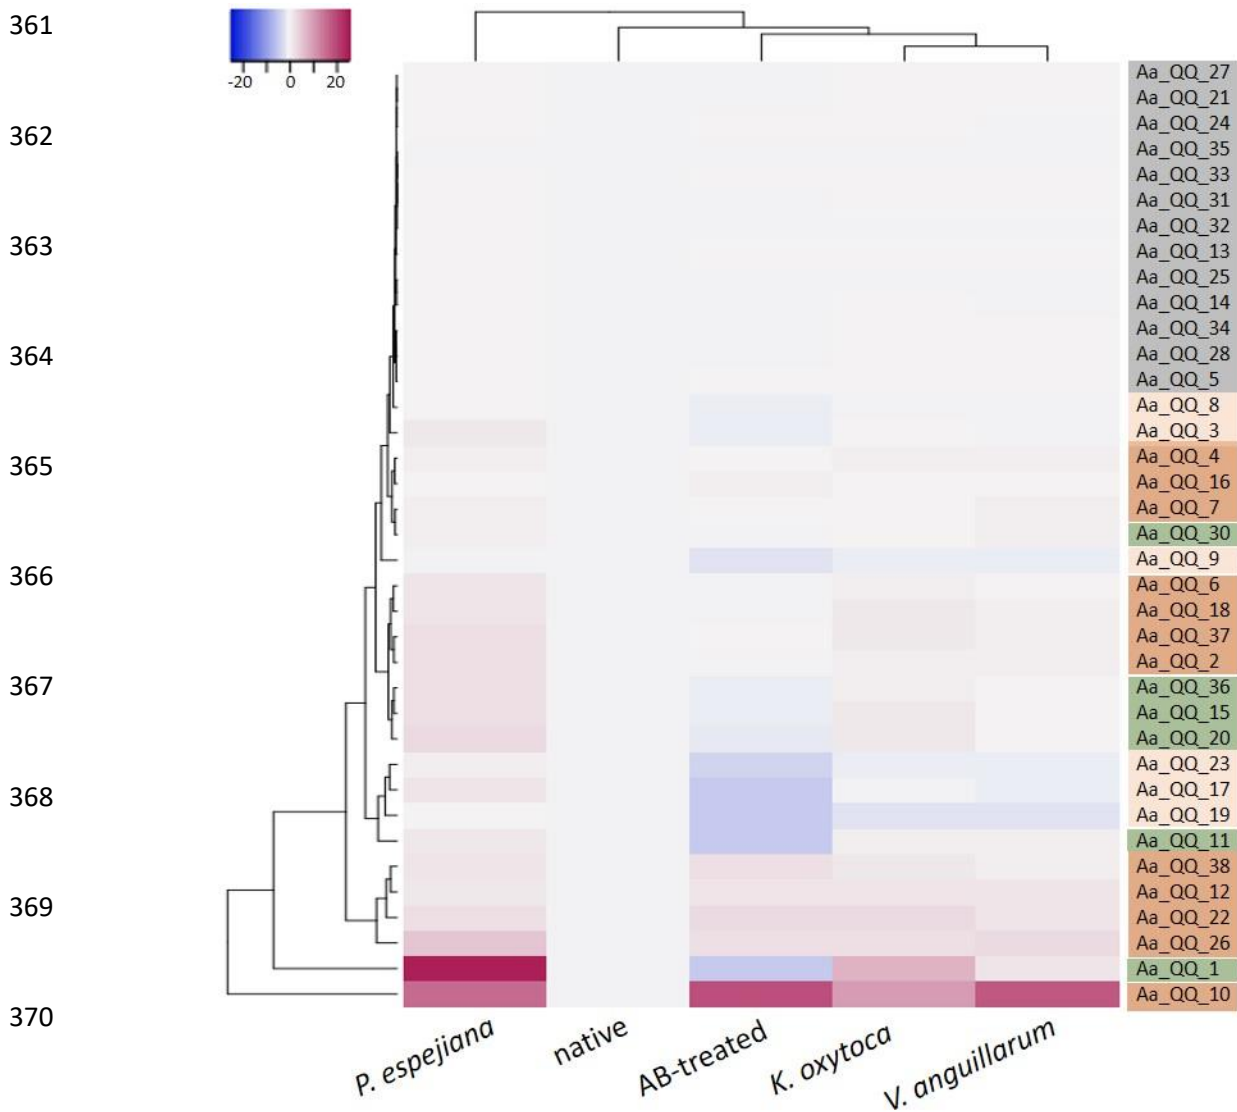

381 (Provasoli and Pintner, 1980; Liu et al., 2017a; KleinJan et al., 2022), and has been shown to only  
382 partially eliminate an entire bacterial community (Azma et al., 2010; Liu et al., 2017a). We assume  
383 that by drastically reducing the colony-forming units by 87 %, the diversity and abundance of  
384 community members on the polyp are crucially changed. Consequently, the polyp was confronted  
385 with the loss of certain community members and a drastic change in the relative abundance of  
386 remaining ones. This extreme change in microbiome composition resulted in the up-regulation of  
387 various immune response mechanisms. Pattern recognition receptors (PRRs) like Toll-like  
388 receptors and Ficolins were upregulated, inducing the first line of defense (**Fig. 3**). Further,  
389 Caspases were enriched in AB-treated polyps, potentially maintaining homeostasis through  
390 regulating cell death and inflammation (McIlwain et al., 2013). Contrarily, all processes involved  
391 in morphogenesis and development, thus not essential for survival, were down-regulated in AB-  
392 treated polyps (**Fig. 3**).

393 Furthermore, the native microbiome was affected by challenging the polyps with three different  
394 bacteria in high cell numbers: (i) *K. oxytoca* has not been detected in any life stage of *A. aurita*  
395 and thus represents a non-native bacterium (Weiland-Bräuer et al., 2015a; Weiland-Bräuer et al.,  
396 2019); (ii) *V. anguillarum*, an opportunistic pathogen of various invertebrates and vertebrates,  
397 has been isolated from an *A. aurita* polyp (Austin, 2010; Frans et al., 2011; Weiland-Bräuer et al.,  
398 2015a; Weiland-Bräuer et al., 2020b); and (iii) *P. espejiana* was initially isolated from seawater  
399 but was also found in high abundance associated with all life stages of *A. aurita*, thus representing  
400 a native bacterium (Isnansetyo and Kamei, 2009; Weiland-Bräuer et al., 2015a; Weiland-Bräuer  
401 et al., 2020b). Due to bacterial challenges, we observed the up-regulation of defense, immune,  
402 and inflammatory responses, and apoptosis regardless of the bacterial species. Based on this

403 finding, we hypothesize that the host recognized the non-native and native bacteria as a potential  
404 threat, at least when present in such high cell numbers. The immune system of *A. aurita* likely  
405 responded with the four primary innate immune system functions as demonstrated for other  
406 Cnidarians and already partly observed for AB-treated polyps (Miller et al., 2007; Parisi et al.,  
407 2020). First, immune recognition occurred by PRRs, like Fucolectins, Ficolins, and NACHT-  
408 containing domain proteins, binding to bacterial MAMPs/PAMPs (**Figs. 4, 5**). Subsequently,  
409 various transcription factors from the NF- $\kappa$ B family were activated (**Figs. 4, 5**). Intracellular  
410 signaling cascades (MAPK, interleukin, cytokines) led to target gene transcription to eliminate the  
411 threat and mitigate self-harm (**Figs. 4, 5**). Lastly, autophagy, DNA repair, and programmed cell  
412 death were upregulated after bacterial challenge (**Figs. 4, 5**). Our observations are consistent with  
413 previous results showing that *A. aurita*'s general fitness and, in particular, its asexual reproduction  
414 were drastically affected in the absence of microbes and due to the manipulation of the  
415 microbiota by challenging with non-native colonizers, e.g., *P. espejiana* and *V. anguillarum*  
416 (Weiland-Bräuer et al., 2020a).

417 The acquisition, establishment, and maintenance of a specific microbiota are advantageous for  
418 the host, and its disturbance can contribute to developing diseases (Zheng et al., 2020). The host  
419 strives to maintain this homeostasis and presumably uses other defense mechanisms besides the  
420 innate immune system (Nichols and Davenport, 2021). The use of bacterial communication and  
421 its interference by the host has been recently regarded as an additional interaction mechanism  
422 within the complex interplay of the host and its microbiome (White et al., 2020; Weiland-Bräuer,  
423 2021). Several studies evaluated the implication of highly conserved paraoxonases (PON1, PON2,  
424 and PON3) as QQ enzymes of the host defense against the pathogen *Pseudomonas aeruginosa*

425 (Mochizuki et al., 1998; Draganov et al., 2005; Stoltz et al., 2007). In the present study, we  
426 functionally detected QQ activities of *A. aurita* in a cDNA expression library and verified the  
427 respective transcripts within the *de novo* assembled host transcriptome. Their native expression  
428 in response to microbiome manipulation resulted in four different expression profiles (**Fig. 6**). A  
429 first cluster represents QQ-ORFs similarly low expressed in treated and native polyps. Those  
430 findings argue against a biological function in the defense against pathogens. The second cluster  
431 showed decreased expression in all treatments except when challenged with *P. espejiana*. Here,  
432 a specific defense against *P. espejiana* can be assumed. This assumption aligns with previous  
433 studies showing massive declined survival rates in the presence of this bacterium (Weiland-Bräuer  
434 et al., 2020a). The multitude of initiated defense mechanisms in the presence of the ubiquitous,  
435 native *P. espejiana* (various QQ-ORFs and acute inflammatory response, **Figs. 5, 6**) might indicate  
436 that this bacterium represents a threat to *A. aurita*, at least in the high cell numbers, and must be  
437 rapidly defended. The third type of expression profile showed increased expression regardless of  
438 the type of microbiome manipulation, assuming a general defense. Among those is Ferritin,  
439 generally regarded as an intracellular iron storage protein and suggested to be involved in  
440 response to infection in different organisms, including fish and marine invertebrates (Moreira et  
441 al., 2020). The expression of Ferritin or Ferritin-homologs was upregulated in different tissues in  
442 response to bacterial infections or stimulation with LPS (Neves et al., 2009; He et al., 2013; Ren  
443 et al., 2014; Chen et al., 2016; Sun et al., 2016; Liu et al., 2017b; Martínez et al., 2017).  
444 Furthermore, Ferritin was shown to protect shrimp and fish from viral infections (Ye et al., 2015;  
445 Chen et al., 2018). The fourth cluster was expressed in the presence of the non-native and native  
446 bacteria, regarded as potential pathogens, but not after antibiotic treatment, assuming a fast  
447 response to potential pathogens' colonization possessing similar PAMPs. Homologies to already

448 described genes within the NCBI database of those QQ-ORFs to predict their function were rare.  
449 QQ-ORFs Aa\_QQ\_15 and Aa\_QQ\_30, belonging to the fourth cluster, showed non-significant  
450 homologies to a chitinase and acetyl-transferase, respectively. Here, enzymatic modification  
451 (hydrolysis or acetylation) of the bacterial signaling molecule can be speculated. The four other  
452 QQ-ORFs within this expression profile showed the best homologies with highly conserved  
453 proteins, including actin, heat shock, and ribosomal proteins. Particularly, ribosomal proteins  
454 crucially involved in translation have been shown to comprise other functions (Hurtado-Rios et  
455 al., 2022), thus recognized as moonlighting proteins. Moonlighting proteins are capable of  
456 performing more than one biochemical function within the same polypeptide chain, including  
457 inhibiting infectious bacteria, viruses, parasites, fungi, and tumor cells (Jeffery, 2003; Gao and  
458 Hardwidge, 2011; Wang et al., 2015; Singh and Bhalla, 2020). Thus, they have been considered  
459 antimicrobial peptides (AMPs) (Hurtado-Rios et al., 2022). Consequently, we hypothesize that the  
460 identified QQ activity, besides their canonical function, is promiscuous. Future studies have to be  
461 conducted to verify the biological function of the identified *A. aurita* QQ-ORFs, e.g., by genetic  
462 and biochemical approaches.

463 In conclusion, this study provides the first *A. aurita* transcriptome analysis focusing on the impact  
464 of microbiome disturbance on host gene expression. Overall it highlights the importance of the  
465 native microbiome since processes like morphogenesis, development, and response reactions are  
466 down-regulated when it is disturbed due to antibiotics. Microbiome disturbance further induced  
467 apoptosis and immune responses, indicating the microbiome's protective function. Similarly,  
468 challenging *A. aurita* with high loads of bacteria resulted in the up-regulation of defense, immune,  
469 and inflammatory responses to maintain metaorganismal homeostasis. We have further received



470 indications that quorum quenching is likely an additional mechanism for maintaining the specific  
471 microbiota besides the innate immune system, particularly acting as a fast response to potential  
472 pathogens.

473

## 474 5. References

475

- 476 Al-Asmakh, M., and Zadjali, F. (2015). Use of germ-free animal models in microbiota-related research.  
477 *Journal of microbiology and biotechnology* 25(10), 1583-1588.
- 478 Augustin, R., Fraune, S., and Bosch, T.C. (Year). "How *Hydra* senses and destroys microbes", in: *Seminars*  
479 *in immunology*: Elsevier), 54-58.
- 480 Austin, B. (2010). Vibrios as causal agents of zoonoses. *Veterinary microbiology* 140(3-4), 310-317.
- 481 Azma, M., Mohamad, R., Rahim, R.A., and Ariff, A.B. (2010). Improved Protocol for the Preparation of  
482 Axenic Culture and Adaptation to Heterotrophic Cultivation. *The Open Biotechnology Journal* 4(1).
- 483 Bäckhed, F., Fraser, C.M., Ringel, Y., Sanders, M.E., Sartor, R.B., Sherman, P.M., et al. (2012). Defining a  
484 healthy human gut microbiome: current concepts, future directions, and clinical applications. *Cell*  
485 *host & microbe* 12(5), 611-622.
- 486 Ball, E.E., Hayward, D.C., Saint, R., and Miller, D.J. (2004). A simple plan—cnidarians and the origins of  
487 developmental mechanisms. *Nature Reviews Genetics* 5(8), 567-577.
- 488 Bang, C., Dagan, T., Deines, P., Dubilier, N., Duschl, W.J., Fraune, S., et al. (2018). Metaorganisms in  
489 extreme environments: do microbes play a role in organismal adaptation? *Zoology* 127, 1-19.
- 490 Bolger, A.M., Lohse, M., and Usadel, B. (2014). Trimmomatic: a flexible trimmer for Illumina sequence data.  
491 *Bioinformatics* 30(15), 2114-2120.
- 492 Bosch, T.C. (2013). Cnidarian-microbe interactions and the origin of innate immunity in metazoans. *Annual*  
493 *review of microbiology* 67, 499-518.
- 494 Bosch, T.C., and Zasloff, M. (2021). Antimicrobial peptides—or how our ancestors learned to control the  
495 microbiome. *MBio* 12(5), e01847-01821.
- 496 Brekhman, V., Malik, A., Haas, B., Sher, N., and Lotan, T. (2015). Transcriptome profiling of the dynamic  
497 life cycle of the scyphozoan jellyfish *Aurelia aurita*. *BMC Genomics* 16(1), 74. doi:  
498 <http://doi.org/10.1186/s12864-015-1320-z>.
- 499 Chen, G., Zhang, C., Wang, Y., Guo, C., Sang, F., and Wang, C. (2016). Identification and characterization of  
500 a ferritin gene involved in the immune defense response of scallop *Chlamys farreri*. *Fish & Shellfish*  
501 *Immunology* 55, 1-9.
- 502 Chen, X.-X., Li, Y.-Y., Chang, X.-J., Xie, X.-L., Liang, Y.-T., Wang, K.-J., et al. (2018). A CqFerritin protein  
503 inhibits white spot syndrome virus infection via regulating iron ions in red claw crayfish *Cherax*  
504 *quadricarinatus*. *Developmental & Comparative Immunology* 82, 104-112.
- 505 Chilton, S.N., Enos, M.K., Burton, J.P., and Reid, G. (2015). The effects of diet and the microbiome on  
506 reproduction and longevity: a comparative review across 5 continents. *Journal of Nutrition & Food*  
507 *Sciences* 5(3).
- 508 Chu, H., and Mazmanian, S.K. (2013). Innate immune recognition of the microbiota promotes host-  
509 microbial symbiosis. *Nature immunology* 14(7), 668-675.

- 510 Conesa, A., Götz, S., García-Gómez, J.M., Terol, J., Talón, M., and Robles, M. (2005). Blast2GO: a universal  
511 tool for annotation, visualization and analysis in functional genomics research. *Bioinformatics*  
512 21(18), 3674-3676.
- 513 Conesa, A., Madrigal, P., Tarazona, S., Gomez-Cabrero, D., Cervera, A., McPherson, A., et al. (2016). A  
514 survey of best practices for RNA-seq data analysis. *Genome biology* 17(1), 1-19.
- 515 Dierking, K., and Pita, L. (2020). Receptors mediating host-microbiota communication in the  
516 metaorganism: the invertebrate perspective. *Frontiers in immunology* 11, 1251.
- 517 Draganov, D.I., Teiber, J.F., Speelman, A., Osawa, Y., Sunahara, R., and La Du, B.N. (2005). Human  
518 paraoxonases (PON1, PON2, and PON3) are lactonases with overlapping and distinct substrate  
519 specificities. *J Lipid Res* 46(6), 1239-1247. doi: <http://doi.org/10.1194/jlr.M400511-JLR200>.
- 520 Ezenwa, V.O., Gerardo, N.M., Inouye, D.W., Medina, M., and Xavier, J.B. (2012). Animal behavior and the  
521 microbiome. *Science* 338(6104), 198-199.
- 522 Frans, I., Michiels, C.W., Bossier, P., Willems, K., Lievens, B., and Rediers, H. (2011). *Vibrio anguillarum* as  
523 a fish pathogen: virulence factors, diagnosis and prevention. *Journal of fish diseases* 34(9), 643-  
524 661.
- 525 Fu, Z.D., Selwyn, F.P., Cui, J.Y., and Klaassen, C.D. (2017). RNA-Seq profiling of intestinal expression of  
526 xenobiotic processing genes in germ-free mice. *Drug Metabolism and Disposition* 45(12), 1225-  
527 1238.
- 528 Gao, X., and Hardwidge, P.R. (2011). Ribosomal protein s3: a multifunctional target of attaching/effacing  
529 bacterial pathogens. *Frontiers in microbiology* 2, 137.
- 530 Gold, D.A., Katsuki, T., Li, Y., Yan, X., Regulski, M., Ibberson, D., et al. (2019). The genome of the jellyfish  
531 *Aurelia* and the evolution of animal complexity. *Nature ecology & evolution* 3(1), 96-104.
- 532 Grabherr, M.G., Haas, B.J., Yassour, M., Levin, J.Z., Thompson, D.A., Amit, I., et al. (2011a). Full-length  
533 transcriptome assembly from RNA-Seq data without a reference genome. *Nature biotechnology*  
534 29(7), 644-652.
- 535 Grabherr, M.G., Haas, B.J., Yassour, M., Levin, J.Z., Thompson, D.A., Amit, I., et al. (2011b). Trinity:  
536 reconstructing a full-length transcriptome without a genome from RNA-Seq data. *Nature*  
537 *biotechnology* 29(7), 644.
- 538 Grandclément, C., Tannières, M., Morâra, S., Dessaux, Y., and Faure, D.D. (2016). Quorum quenching: role  
539 in nature and applied developments. *FEMS microbiology reviews*, fuv038.
- 540 He, S., Peng, K., Hong, Y., Wang, J., Sheng, J., and Gu, Q. (2013). Molecular properties and immune defense  
541 of two ferritin subunits from freshwater pearl mussel, *Hyriopsis schlegelii*. *Fish & shellfish*  
542 *immunology* 34(3), 865-874.
- 543 Hurtado-Rios, J.J., Carrasco-Navarro, U., Almanza-Pérez, J.C., and Ponce-Alquicira, E. (2022). Ribosomes:  
544 the new role of ribosomal proteins as natural antimicrobials. *International Journal of Molecular*  
545 *Sciences* 23(16), 9123.
- 546 Isnansetyo, A., and Kamei, Y. (2009). Bioactive substances produced by marine isolates of *Pseudomonas*.  
547 *Journal of Industrial Microbiology and Biotechnology* 36(10), 1239-1248.
- 548 Jacob, S., Parthuisot, N., Vallat, A., Ramon-Portugal, F., Helfenstein, F., and Heeb, P. (2015). Microbiome  
549 affects egg carotenoid investment, nestling development and adult oxidative costs of reproduction  
550 in Great tits. *Functional Ecology* 29(8), 1048-1058.
- 551 Jeffery, C.J. (2003). Moonlighting proteins: old proteins learning new tricks. *TRENDS in Genetics* 19(8), 415-  
552 417.
- 553 Jensen, N., Weiland-Bräuer, N., Joel, S., Chibani, C.M., and Schmitz, R.A. (2023). "Asexual reproduction of  
554 *Aurelia aurita* depends on the presence of a balanced microbiome at polyp stage". Research  
555 Square).
- 556 Kiran, G.S., Hassan, S., Sajayan, A., and Selvin, J. (2017). "Quorum Quenching Compounds from Natural  
557 Sources," in *Bioresources and Bioprocess in Biotechnology*, 351-364.

- 558 KleinJan, H., Frioux, C., Califano, G., Aite, M., Fremy, E., Karimi, E., et al. (2022). Insights into the potential  
559 for mutualistic and harmful host–microbe interactions affecting brown alga freshwater  
560 acclimation. *Molecular Ecology*.
- 561 Ladewig, L., Gloy, L., Langfeldt, D., Pinnow, N., Weiland-Bräuer, N., and Schmitz, R.A. (2023). "Antimicrobial  
562 peptides originating from expression libraries of *Aurelia aurita* and *Mnemiopsis leidyi* prevent  
563 biofilm formation of opportunistic pathogens". bioRxiv).
- 564 Langmead, B., and Salzberg, S.L. (2012). Fast gapped-read alignment with Bowtie 2. *Nature methods* 9(4),  
565 357-359.
- 566 Li, B., and Dewey, C.N. (2011). RSEM: accurate transcript quantification from RNA-Seq data with or without  
567 a reference genome. *BMC bioinformatics* 12, 1-16.
- 568 Liu, C.-L., Place, A.R., and Jagus, R. (2017a). Use of Antibiotics for Maintenance of Axenic Cultures of  
569 *Amphidinium carterae* for the Analysis of Translation. *Marine Drugs* 15(8), 242.
- 570 Liu, J., Meng, Z., Liu, X., and Zhang, X.-H. (2019). Microbial assembly, interaction, functioning, activity and  
571 diversification: a review derived from community compositional data. *Marine Life Science &  
572 Technology* 1(1), 112-128. doi: 10.1007/s42995-019-00004-3.
- 573 Liu, Q.-N., Xin, Z.-Z., Liu, Y., Wang, Z.-F., Chen, Y.-J., Zhang, D.-Z., et al. (2017b). A ferritin gene from  
574 *Procambarus clarkii*, molecular characterization and in response to heavy metal stress and  
575 lipopolysaccharide challenge. *Fish & Shellfish Immunology* 63, 297-303.
- 576 Martínez, D., Oyarzún, R., Vargas-Lagos, C., Pontigo, J., Soto-Dávila, M., Saravia, J., et al. (2017).  
577 Identification, characterization and modulation of ferritin-H in the sub-Antarctic Notothenioid  
578 *Eleginops maclovinus* challenged with *Piscirickettsia salmonis*. *Developmental & Comparative  
579 Immunology* 73, 88-96.
- 580 McCarthy, D.J., Chen, Y., and Smyth, G.K. (2012). Differential expression analysis of multifactor RNA-Seq  
581 experiments with respect to biological variation. *Nucleic acids research* 40(10), 4288-4297.
- 582 McIlwain, D.R., Berger, T., and Mak, T.W. (2013). Caspase functions in cell death and disease. *Cold Spring  
583 Harbor perspectives in biology* 5(4), a008656.
- 584 Miller, D., Hemmrich, G., Ball, E., Hayward, D., Khalturin, K., Funayama, N., et al. (2007). The innate immune  
585 repertoire in Cnidaria - ancestral complexity and stochastic gene loss. *Genome Biol* 8(4), R59.
- 586 Mochizuki, H., Scherer, S.W., Xi, T., Nickle, D.C., Majer, M., Huizenga, J.J., et al. (1998). Human PON2 gene  
587 at 7q21.3: cloning, multiple mRNA forms, and missense polymorphisms in the coding sequence.  
588 *Gene* 213(1-2), 149-157. doi: 10.1016/s0378-1119(98)00193-0.
- 589 Moran, N.A., and Yun, Y. (2015). Experimental replacement of an obligate insect symbiont. *Proceedings of  
590 the National Academy of Sciences* 112(7), 2093-2096.
- 591 Moreira, A.C., Mesquita, G., and Gomes, M.S. (2020). Ferritin: an inflammatory player keeping iron at the  
592 core of pathogen-host interactions. *Microorganisms* 8(4), 589.
- 593 Mukherjee, S., and Bassler, B.L. (2019). Bacterial quorum sensing in complex and dynamically changing  
594 environments. *Nat Rev Microbiol*. doi: 10.1038/s41579-019-0186-5.
- 595 Neves, J.V., Wilson, J.M., and Rodrigues, P.N. (2009). Transferrin and ferritin response to bacterial  
596 infection: the role of the liver and brain in fish. *Developmental & Comparative Immunology* 33(7),  
597 848-857.
- 598 Nichols, R.G., and Davenport, E.R. (2021). The relationship between the gut microbiome and host gene  
599 expression: a review. *Human genetics* 140(5), 747-760.
- 600 Ochsenkühn, M.A., Röthig, T., D'Angelo, C., Wiedenmann, J., and Voolstra, C.R. (2017). The role of  
601 floridoside in osmoadaptation of coral-associated algal endosymbionts to high-salinity conditions.  
602 *Science Advances* 3(8), e1602047.
- 603 Parisi, M.G., Parrinello, D., Stabili, L., and Cammarata, M. (2020). Cnidarian immunity and the repertoire  
604 of defense mechanisms in anthozoans. *Biology* 9(9), 283.

- 605 Park, E., Hwang, D.-S., Lee, J.-S., Song, J.-I., Seo, T.-K., and Won, Y.-J. (2012). Estimation of divergence times  
606 in cnidarian evolution based on mitochondrial protein-coding genes and the fossil record.  
607 *Molecular phylogenetics and evolution* 62(1), 329-345.
- 608 Pierre, J.F. (2022). Introduction and Background to Microbiome Research.
- 609 Pietschke, C., Treitz, C., Foret, S., Schultze, A., Kunzel, S., Tholey, A., et al. (2017). Host modification of a  
610 bacterial quorum-sensing signal induces a phenotypic switch in bacterial symbionts. *Proc Natl  
611 Acad Sci U S A* 114(40), E8488-E8497. doi: <http://doi.org/10.1073/pnas.1706879114>.
- 612 Provasoli, L., and Pintner, I.J. (1980). Bacteria induced polymorphism in an axenic laboratory strain of *Ulva*  
613 *lactuca* (Chlorophyceae) 1. *Journal of phycology* 16(2), 196-201.
- 614 Putnam, N.H., Srivastava, M., Hellsten, U., Dirks, B., Chapman, J., Salamov, A., et al. (2007). Sea anemone  
615 genome reveals ancestral eumetazoan gene repertoire and genomic organization. *Science*  
616 317(5834), 86-94.
- 617 Ren, C., Chen, T., Jiang, X., Wang, Y., and Hu, C. (2014). Identification and functional characterization of a  
618 novel ferritin subunit from the tropical sea cucumber, *Stichopus monotuberculatus*. *Fish & Shellfish  
619 Immunology* 38(1), 265-274.
- 620 Richardson, A.J., Bakun, A., Hays, G.C., and Gibbons, M.J. (2009). The jellyfish joyride: causes,  
621 consequences and management responses to a more gelatinous future. *Trends in ecology &  
622 evolution* 24(6), 312-322.
- 623 Robinson, M.D., McCarthy, D.J., and Smyth, G.K. (2010). edgeR: a Bioconductor package for differential  
624 expression analysis of digital gene expression data. *bioinformatics* 26(1), 139-140.
- 625 Rook, G., Bäckhed, F., Levin, B.R., McFall-Ngai, M.J., and McLean, A.R. (2017). Evolution, human-microbe  
626 interactions, and life history plasticity. *The Lancet* 390(10093), 521-530.
- 627 Rosenstiel, P., Philipp, E. E. R., Schreiber, S., Bosch, T. C. G. (2009). Evolution and Function of Innate  
628 Immune Receptors – Insights from Marine Invertebrates. *Journal of Innate Immunity* 1, 291-300.
- 629 Simão, F.A., Waterhouse, R.M., Ioannidis, P., Kriventseva, E.V., and Zdobnov, E.M. (2015). BUSCO:  
630 assessing genome assembly and annotation completeness with single-copy orthologs.  
631 *Bioinformatics* 31(19), 3210-3212.
- 632 Singh, N., and Bhalla, N. (2020). Moonlighting proteins. *Annual review of genetics* 54, 265-285.
- 633 Sommer, F., and Bäckhed, F. (2013). The gut microbiota—masters of host development and physiology.  
634 *Nature Reviews Microbiology* 11(4), 227-238.
- 635 Stoltz, D.A., Ozer, E.A., Ng, C.J., Yu, J.M., Reddy, S.T., Lusic, A.J., et al. (2007). Paraoxonase-2 deficiency  
636 enhances *Pseudomonas aeruginosa* quorum sensing in murine tracheal epithelia. *American  
637 Journal of Physiology-Lung Cellular and Molecular Physiology* 292(4), L852-L860.
- 638 Sun, S., Zhu, J., Ge, X., and Zhang, W. (2016). Molecular characterization and gene expression of ferritin in  
639 blunt snout bream (*Megalobrama amblycephala*). *Fish & Shellfish Immunology* 57, 87-95.
- 640 Wang, W., Nag, S., Zhang, X., Wang, M.H., Wang, H., Zhou, J., et al. (2015). Ribosomal proteins and human  
641 diseases: pathogenesis, molecular mechanisms, and therapeutic implications. *Medicinal research  
642 reviews* 35(2), 225-285.
- 643 Webster, N.S., and Reusch, T.B. (2017). Microbial contributions to the persistence of coral reefs. *The ISME  
644 journal* 11(10), 2167-2174.
- 645 Weiland-Bräuer, N. (2021). Friends or Foes—Microbial Interactions in Nature. *Biology* 10(6), 496.
- 646 Weiland-Bräuer, N., Fischer, M.A., Pinnow, N., and Schmitz, R.A. (2019). Potential role of host-derived  
647 quorum quenching in modulating bacterial colonization in the moon jellyfish *Aurelia aurita*.  
648 *Scientific reports* 9(1), 34.
- 649 Weiland-Bräuer, N., Neulinger, S.C., Pinnow, N., Kunzel, S., Baines, J.F., and Schmitz, R.A. (2015a).  
650 Composition of Bacterial Communities Associated with *Aurelia aurita* Changes with Compartment,  
651 Life Stage, and Population. *Appl Environ Microbiol* 81(17), 6038-6052. doi:  
652 <http://doi.org/10.1128/AEM.01601-15>.

- 653 Weiland-Bräuer, N., Pinnow, N., Langfeldt, D., Roik, A., Güllert, S., Chibani, C.M., et al. (2020a). The native  
654 microbiome is crucial for offspring generation and fitness of *Aurelia aurita*. *MBio* 11(6), e02336-  
655 02320.
- 656 Weiland-Bräuer, N., Pinnow, N., and Schmitz, R.A. (2015b). Novel reporter for identification of interference  
657 with acyl homoserine lactone and autoinducer-2 quorum sensing. *Appl Environ Microbiol* 81(4),  
658 1477-1489. doi: <http://doi.org/10.1128/AEM.03290-14>.
- 659 Weiland-Bräuer, N., Prasse, D., Brauer, A., Jaspers, C., Reusch, T.B.H., and Schmitz, R.A. (2020b). Cultivable  
660 microbiota associated with *Aurelia aurita* and *Mnemiopsis leidyi*. *MicrobiologyOpen* 00:e1094.  
661 doi: <https://doi.org/10.1002/mbo3.1094>.
- 662 White, J.R., Dauros-Singorenko, P., Hong, J., Vanholsbeeck, F., Phillips, A., and Swift, S. (2020). The role of  
663 host molecules in communication with the resident and pathogenic microbiota: a review.  
664 *Medicine in Microecology* 4, 100005.
- 665 Woznica, A., Gerdt, J.P., Hulett, R.E., Clardy, J., and King, N. (2017). Mating in the closest living relatives of  
666 animals is induced by a bacterial chondroitinase. *Cell* 170(6), 1175-1183. e1111.
- 667 Ye, T., Wu, X., Wu, W., Dai, C., and Yuan, J. (2015). Ferritin protect shrimp *Litopenaeus vannamei* from  
668 WSSV infection by inhibiting virus replication. *Fish & shellfish immunology* 42(1), 138-143.
- 669 Zheng, D., Liwinski, T., and Elinav, E. (2020). Interaction between microbiota and immunity in health and  
670 disease. *Cell research* 30(6), 492-506.
- 671 Zheng, L., Zhang, L., Lin, H., McIntosh, M., and Malacrida, A. (2005). Toll-like receptors in invertebrate  
672 innate immunity. *Invertebrate Survival Journal* 2(2), 105-113.
- 673 Ziegler, M., Grupstra, C.G., Barreto, M.M., Eaton, M., BaOmar, J., Zubier, K., et al. (2019). Coral bacterial  
674 community structure responds to environmental change in a host-specific manner. *Nature*  
675 *communications* 10(1), 1-11.
- 676

**Supplementary Materials:** **Table S1:** Transcriptomic data.; **Table S2:** Annotation and Gene Ontology (GO) term identities of the whole transcriptome assembly.; **Table S3:** Differentially expressed genes (DE).; **Table S4:** Gene Ontology (GO) enrichment analysis of the differentially expressed genes.; **Table S5:** Assembly information of function-based identified QQ-ORFs of *A. aurita*.

**Author Contributions:** Conceptualization, R. A. S. and N. W.-B.; methodology, D. L.; investigation, D. L. and N. W.-B.; formal analysis, N. W.-B.; bioinformatics analysis, V. K.; data curation, V. K.; writing—original draft preparation, N. W.-B., V. K., and R. A. S.; writing—review and editing, N. W.-B., V. K., and R. A. S., N. W.-B. and V. K.; supervision, N. W.-B. and R. A. S.; project administration, R. A. S.; funding acquisition, R. A. S.. All authors have read and agreed to the published version of the manuscript.

**Funding:** This work was conducted with the financial support of the DFG-funded Collaborative Research Center CRC1182 "Origin and Function of Metaorganisms" (B2) and the DFG-funded ImmuBase project.

**Acknowledgments:** We thank Sven Künzel and colleagues from the Department for Evolutionary Genetics of the Max Planck Institute for Evolutionary Biology for transcriptome sequencing.

**Conflicts of Interest:** The authors declare no conflict of interest. The funders had no role in the design of the study, in the collection, analyses, or interpretation of data, in the writing of the manuscript, or in the decision to publish the results.
